# Supplementary material
Source: Springer Nature journal article supplement (https://www.springerprofessional.de/resource/supplementary/40537_2013_7_MOESM10_ESM.pdf/10796332)

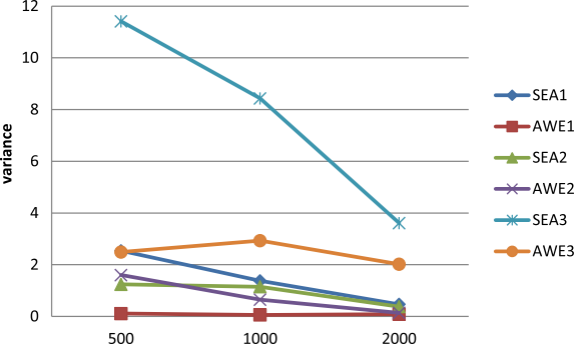

Supplement: MOESM10 [file 10796332]
